# Supplementary material for: Theories and Molecular Basis of Vascular Aging: A Review of the Literature from VascAgeNet Group on Pathophysiological Mechanisms of Vascular Aging
Source: MDPI journal article supplement (doi:10.3390/ijms23158672), 2022-08-04
Supplement: s1 [file s1]

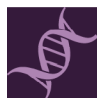

*Review: Supplement*

# Theories and molecular basis of vascular aging: a review of the literature from VascAgeNet group on pathophysiological mechanisms of vascular aging

Eugenia Gkaliagkousi <sup>1,\*</sup>, Antonios Lazaridis <sup>1</sup>, Soner Dogan <sup>2</sup>, Emil Fraenkel <sup>3</sup>, Bilge Guvenc Tuna <sup>4</sup>, Ioana Mozos <sup>5</sup>, Milica Vukicevic <sup>6</sup>, Ozlem Yalcin <sup>7</sup> and Kristina Gopcevic <sup>8,\*</sup>

<sup>1</sup> 3rd Department of Internal Medicine, Papageorgiou Hospital, Faculty of Medicine, Aristotle University of Thessaloniki, Greece; spanbiol@hotmail.com

<sup>2</sup> Department of Medical Biology, School of Medicine, Yeditepe University, Istanbul, Turkey; dogansoner@yahoo.com

<sup>3</sup> 1st Department of Internal Medicine, University Hospital and Pavol Jozef Šafárik University in Košice, Trieda SNP 1, 04066 Košice, Slovakia; emil.fraenkel@hotmail.com

<sup>4</sup> Department of Biophysics, School of Medicine, Yeditepe University, Istanbul, Turkey; bilgeguv@gamil.com

<sup>5</sup> Department of Functional Sciences-Pathophysiology, Center for Translational Research and Systems Medicine, "Victor Babes" University of Medicine and Pharmacy, 300173 Timisoara, Romania; ioanamozos@umft.ro

<sup>6</sup> Cardiac Surgery Clinic, Clinical Center of Serbia, Belgrade, Serbia; milicavukicevicmd@gmail.com

<sup>7</sup> Department of Physiology, School of Medicine, Koc University, Istanbul, Turkey; ozlemyalcin@ku.edu.tr

<sup>8</sup> Laboratory for Analytics of Biomolecules, Department of Chemistry in Medicine, Faculty of Medicine, Belgrade, Serbia

\* Correspondence: egkaliagkousi@auth.gr (E.G.); kristinagopcevic@yahoo.com or kristina.gopcevic@med.bg.ac.rs (K.G.)

**Table S1.** Reactive oxygen and nitrogen species, radicals and nonradicals, their formation, characteristics and detoxification.

| Species            | Formula           | Half life    | Formation                                                                                                                                                                                                                                               | Characteristics                                                                                | Detoxification                         |
|--------------------|-------------------|--------------|---------------------------------------------------------------------------------------------------------------------------------------------------------------------------------------------------------------------------------------------------------|------------------------------------------------------------------------------------------------|----------------------------------------|
| Superoxide         | $O_2^{\bullet -}$ | $10^{-6}$ s  | $O_2 + e^- \rightarrow O_2^{\bullet -}$<br>$O_2 + Fe^{2+} \rightarrow Fe^{3+} + O_2^{\bullet -}$ (auto-oxidation)<br>$O_2^{\bullet -} + O_2^{\bullet -} + 2H_2O$ (Cu,Zn,Mn-SOD)<br>$\rightarrow H_2O_2 + O_2$                                           | Highly unstable, signaling function, synaptic plasticity                                       | SOD (enzymatic), Vit C (non-enzymatic) |
| Hydrogen peroxide  | $H_2O_2$          | Stable       | $O_2^{\bullet -} + O_2^{\bullet -} + 2H_2O$ (Cu,Zn,Mn-SOD)<br>$\rightarrow H_2O_2 + O_2$                                                                                                                                                                | Cell toxicity, signaling function, generation of other ROS                                     | CAT (enzymatic)                        |
| Hydroxyl radical   | $OH^{\bullet}$    | $10^{-10}$ s | $Fe^{2+} + H_2O_2 \rightarrow Fe^{3+} + OH^{\bullet} + OH^-$<br>(Fenton reaction)<br>$O_2^{\bullet -} + H_2O_2 \rightarrow O_2 + OH^{\bullet} + OH^-$<br>(Haber-Weiss reaction)                                                                         | Free radical, highly reactive, very reactive agent                                             | Vit E (non-enzymatic)                  |
| Alkoxyl radical    | $RO^{\bullet}$    | $10^{-6}$ s  | $ROOH + Fe^{3+} \rightarrow RO^{\bullet} + Fe^{2+}$<br>$ROOH + HO_2^{\bullet} \rightarrow RO^{\bullet} + O_2$                                                                                                                                           | Free radical, reaction product of lipids                                                       | Vit C                                  |
| Peroxyl radical    | $ROO^{\bullet}$   | 17 s         | Protonation of $O_2^{\bullet -}$                                                                                                                                                                                                                        | Free radical, reaction product of lipids                                                       | $\beta$ -carotene                      |
| Hypochlorite anion | $OCl^-$           | Stable (min) | $H_2O_2 + Cl^-$ (MPO) $\rightarrow OCl^- + OH^{\bullet}$<br>from activated neutrophils at the site of inflammation                                                                                                                                      | Reactive oxygen species, reactive chlorine species, enzymatically generated by myeloperoxidase | Vit C                                  |
| Singlet oxygen     | $^1O_2$           | $10^{-5}$ s  | $HOCl + H_2O_2 \rightarrow ^1O_2 + H_2O + Cl^-$                                                                                                                                                                                                         | Induced/excited oxygen molecule, radical and non-radical form                                  | $\beta$ -carotene                      |
| Nitric oxide       | $^{\bullet}NO$    | s            | $L\text{-Arg} + O_2 + NADPH$ (NOS) $\rightarrow$ L-Citrulline + $^{\bullet}NO + NADP^+$                                                                                                                                                                 | Environmental toxin, endogenous signal molecule                                                | $O_2^{\bullet -}$                      |
| Peroxynitrite      | $ONOO^{\bullet}$  | $10^{-3}$ s  | $O_2^{\bullet -} + ^{\bullet}NO \rightarrow OONO^{\bullet}$                                                                                                                                                                                             | Highly reactive reaction intermediate of $O_2^{\bullet -}$ and $^{\bullet}NO$                  | GPx                                    |
| Nitrogen dioxide   | $NO_2^{\bullet}$  | s            | $HONO \rightarrow NO_2^{\bullet}$                                                                                                                                                                                                                       | Highly reactive radical, environmental toxin                                                   | $\gamma$ -Tocopherol                   |
| Nitrogen oxides    | $NO_x$            | s            | $NO + O_2 + H_2O \rightarrow NO_3^- + NO_2^{\bullet}$<br>$^{\bullet}NO + e^- \rightarrow NO_2^{+}$ nitrosonium cation<br>$^{\bullet}NO - e^- \rightarrow NO^{\bullet}$ nitroxyl anion<br>$NO_2^{+} + NO^{\bullet} \rightarrow N_2O + OH^{\bullet}$ etc. | Environmental toxins including NO and $NO_2^{\bullet}$ derived from combustion process         | Some bacteria                          |

CAT: catalase; GPx: glutathione peroxidase; NO: nitric oxide; SOD: Superoxide dismutase, Vit: vitamin.
